# Supplementary material for: An analysis of obstetric practices and outcomes in a deep rural district hospital in South Africa
Source: PubMed Central journal article supplement (PMC8726481; doi:10.1371/journal.pone.0262269), 2022-01-04
Supplement: pone.0262269.s001.pdf [file pone.0262269.s001.pdf]

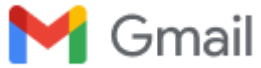

Adam Asghar <adam.asghar@gmail.com>

---

## Perinatal M&M

1 message

---

**Kelly Gate** <kellygate@gmail.com>  
To: Adam Asghar <adam.asghar@gmail.com>

3 February 2020 at 15:07

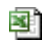

**Perinatal M&M since 2012.xlsx**  
128K
